# Supplementary material for: Bile-salt templated green fluorescent copper nanoclusters: detection of 4-nitrophenol in nanomolar range
Source: Royal Society of Chemistry journal article supplement (doi:10.1039/d4lf00143e), 2024-01-01
Supplement: d4lf00143e1.pdf [file d4lf00143e1.pdf]

**Supporting Information**

**Bile-Salts Templated Green Fluorescent Copper Nanoclusters: Detection of 4-Nitrophenol in**

**Nanomolar Range**

Shivangi,<sup>a</sup> Mandeep Kaur,<sup>a</sup> Neeraj Sohal,<sup>ab</sup> Mallika Phull,<sup>a</sup> and Banibrata Maity<sup>\*a</sup>

*<sup>a</sup>Department of Chemistry and Biochemistry, Thapar Institute of Engineering and Technology Patiala  
147004, India*

*<sup>b</sup>Department of Chemistry, Lovely Professional University, Phagwara, 144411, India*

*\*Corresponding Author E-mail: [banibrata.maity@thapar.edu](mailto:banibrata.maity@thapar.edu) (B. Maity)*

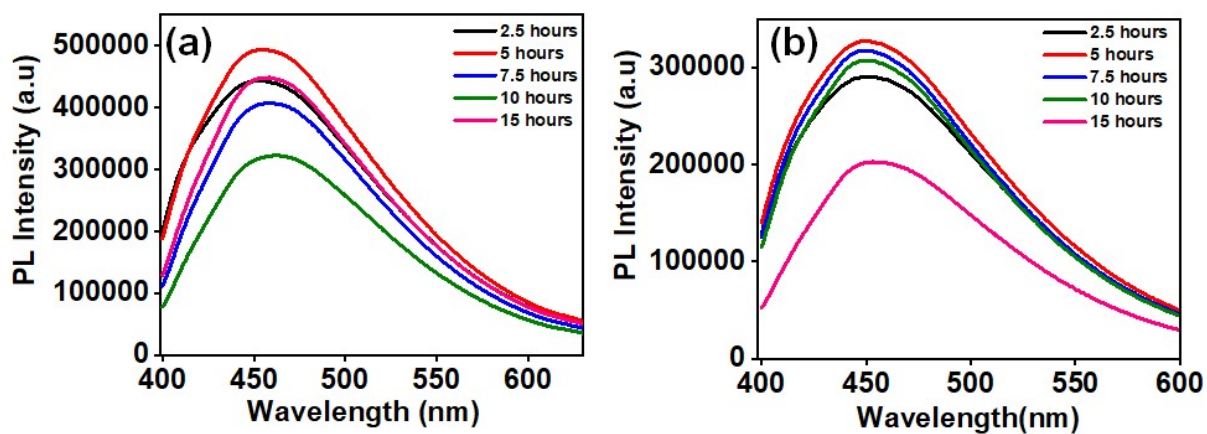

**Figure S1:** PL emission on varying the reaction time of (a) NaC@CuNCs and (b) NaTC@CuNCs.

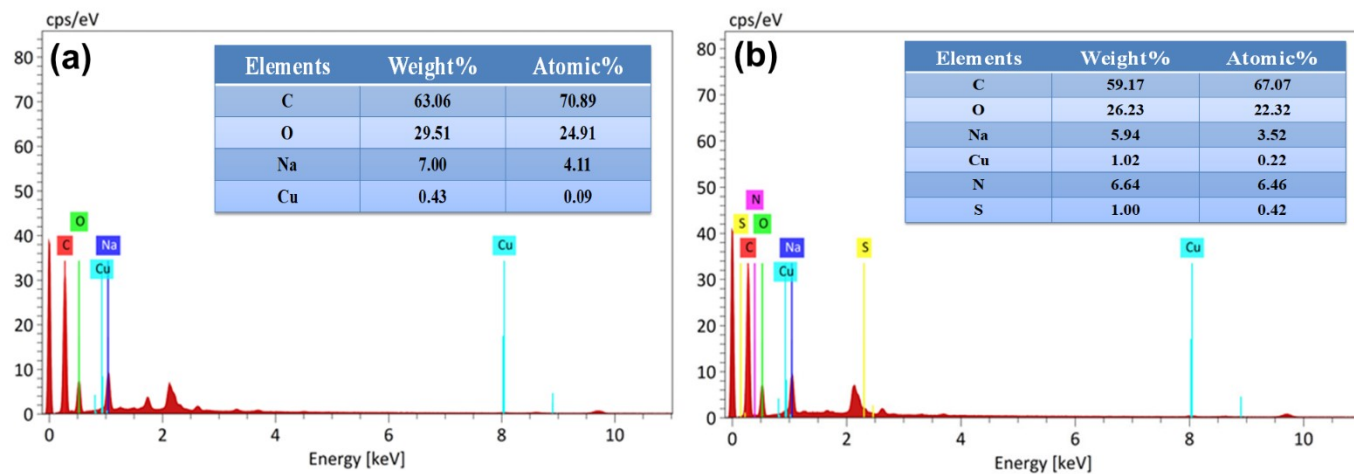

**Figure S2:** EDS spectra of (a) NaC@CuNCs and (b) NaTC@CuNCs.

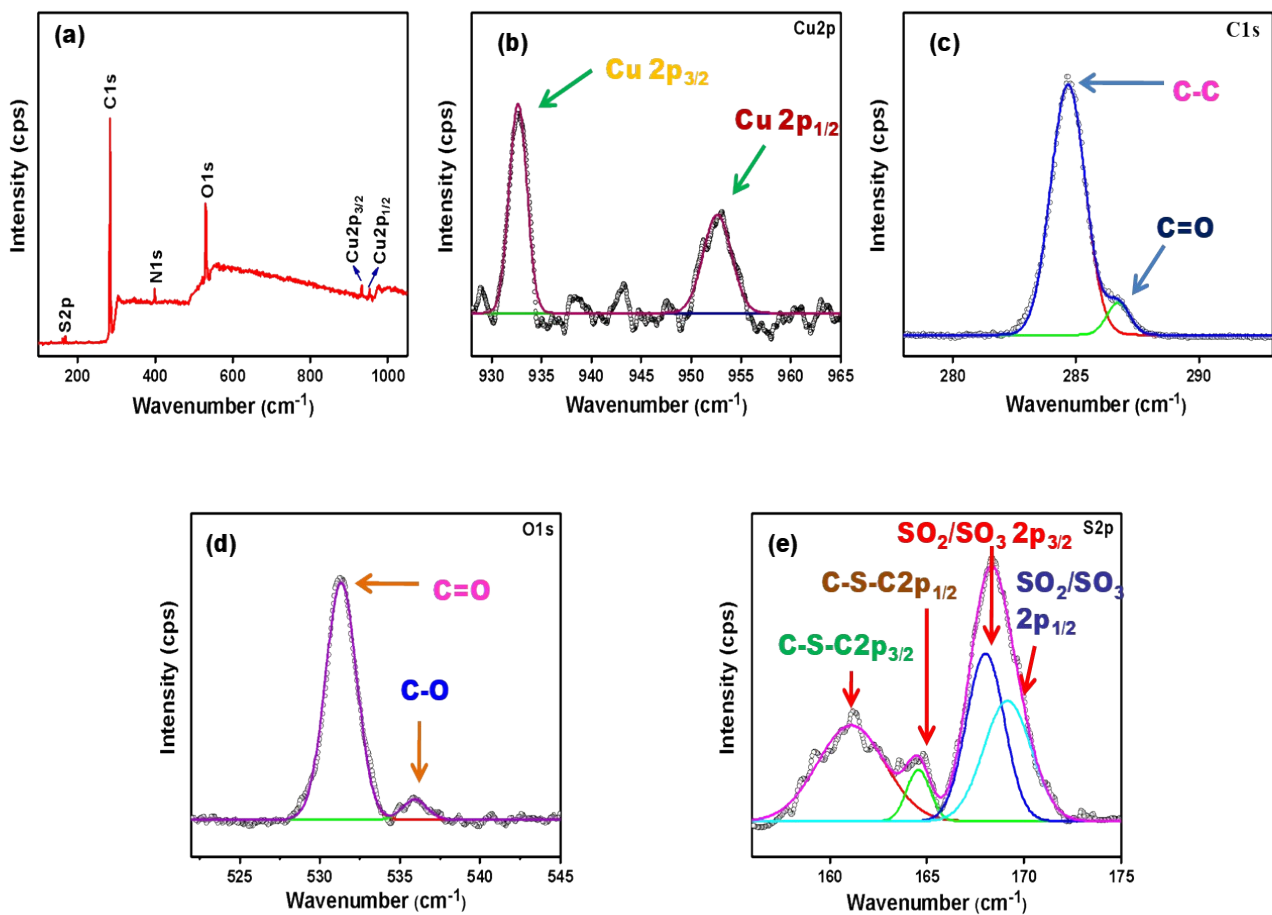

**Figure S3:** (a) XPS survey spectra of NaTC@CuNCs; (b) deconvoluted XPS spectra of Cu2p; (c) deconvoluted XPS spectra of C1s; (d) deconvoluted XPS spectra of O1s; (e) deconvoluted spectra of S2p.

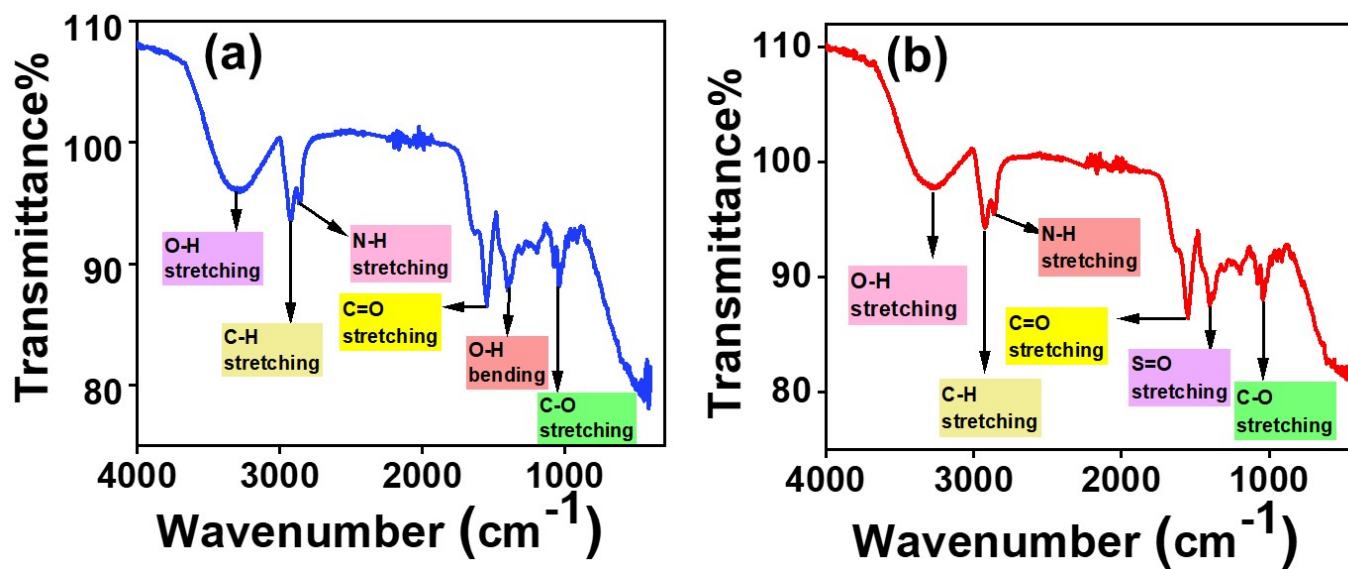

**Figure S4:** FTIR spectra of (a) NaC@CuNCs and (b) NaTC@CuNC

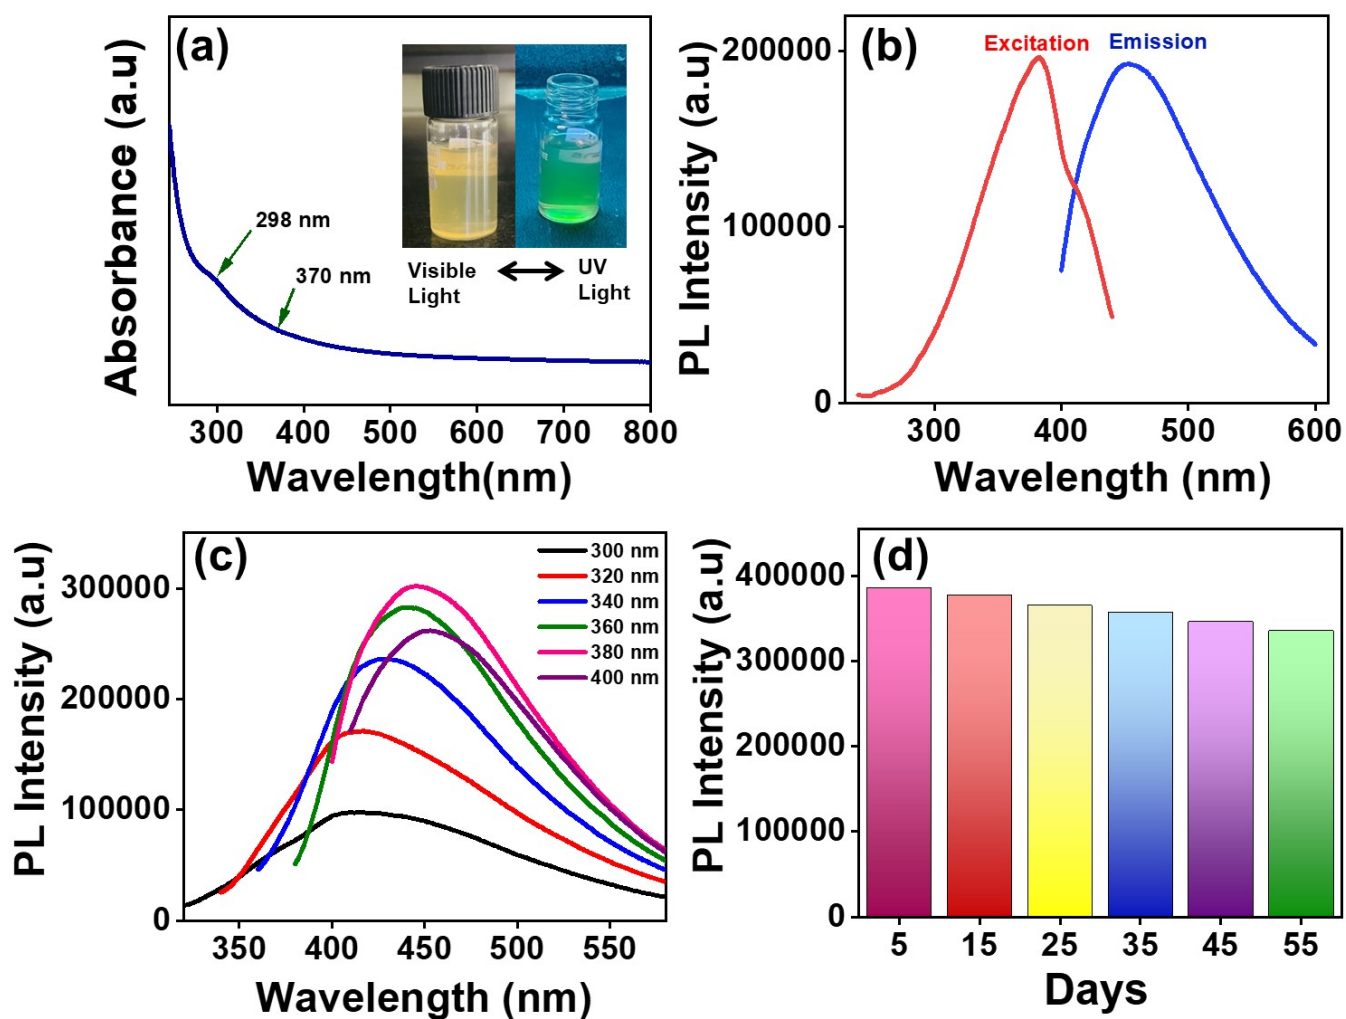

**Figure S5:** (a) UV-Visible spectra of NaC@CuNCs with inset of NaC@CuNCs under visible and UV radiations; (b) excitation and emission wavelength spectra of NaC@CuNCs; (c) excitation wavelength dependent behavior of NaC@CuNCs; (d) effect of storage duration (days) on PL stability of NaC@CuNCs.

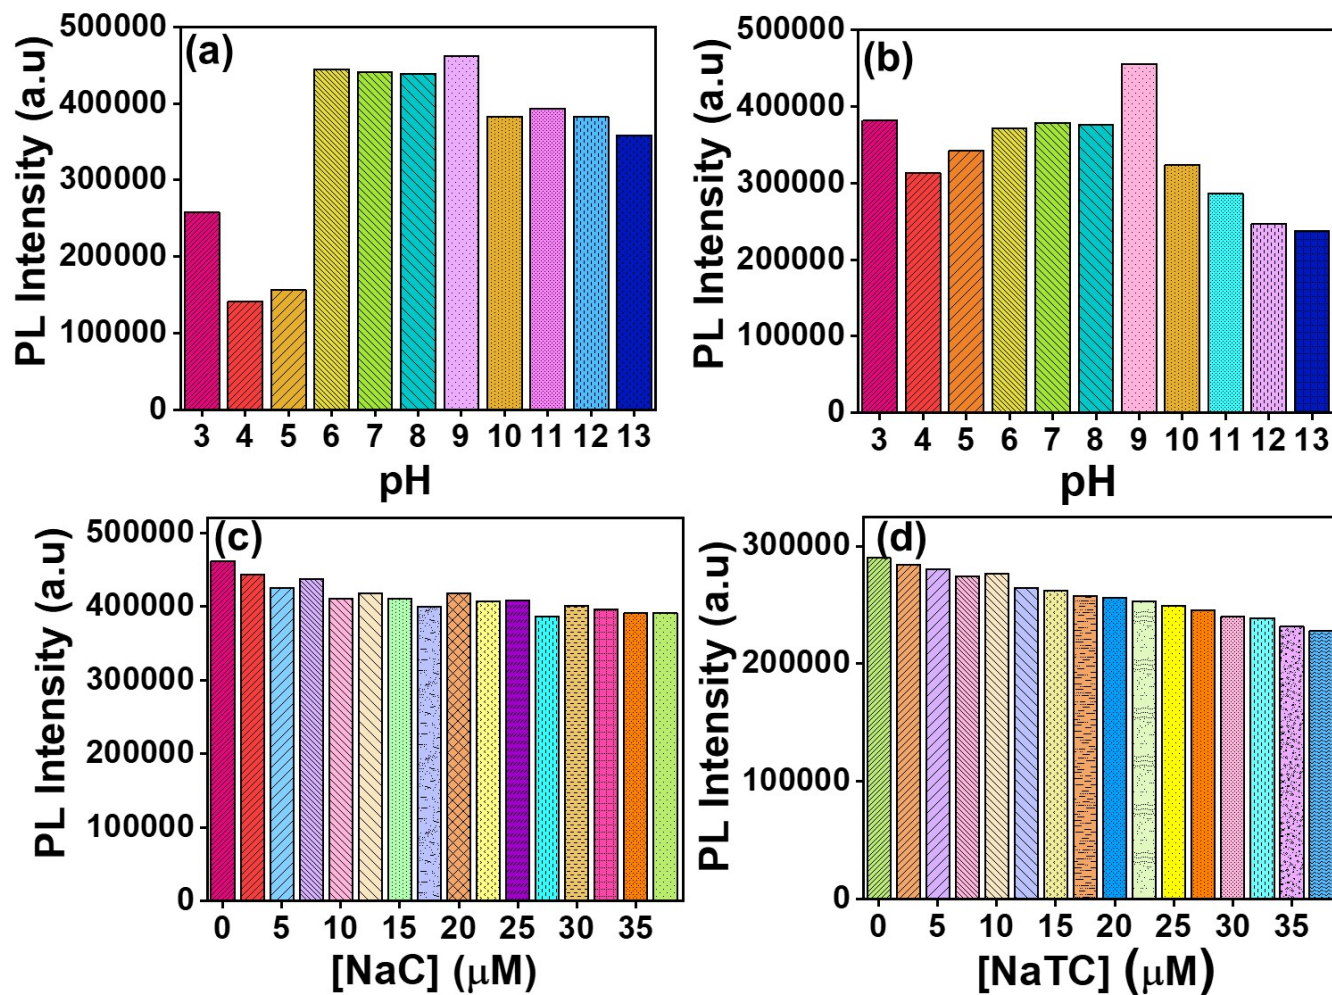

**Figure S6:** (a) Effect of pH variations on PL intensity of NaC@CuNCs; (b) Effect of pH variations on PL intensity of NaTC@CuNCs ;(c) Effect of ionic variations on PL intensity of NaC@CuNCs; (d) Effect of ionic variations on PL intensity of NaTC@CuNCs.



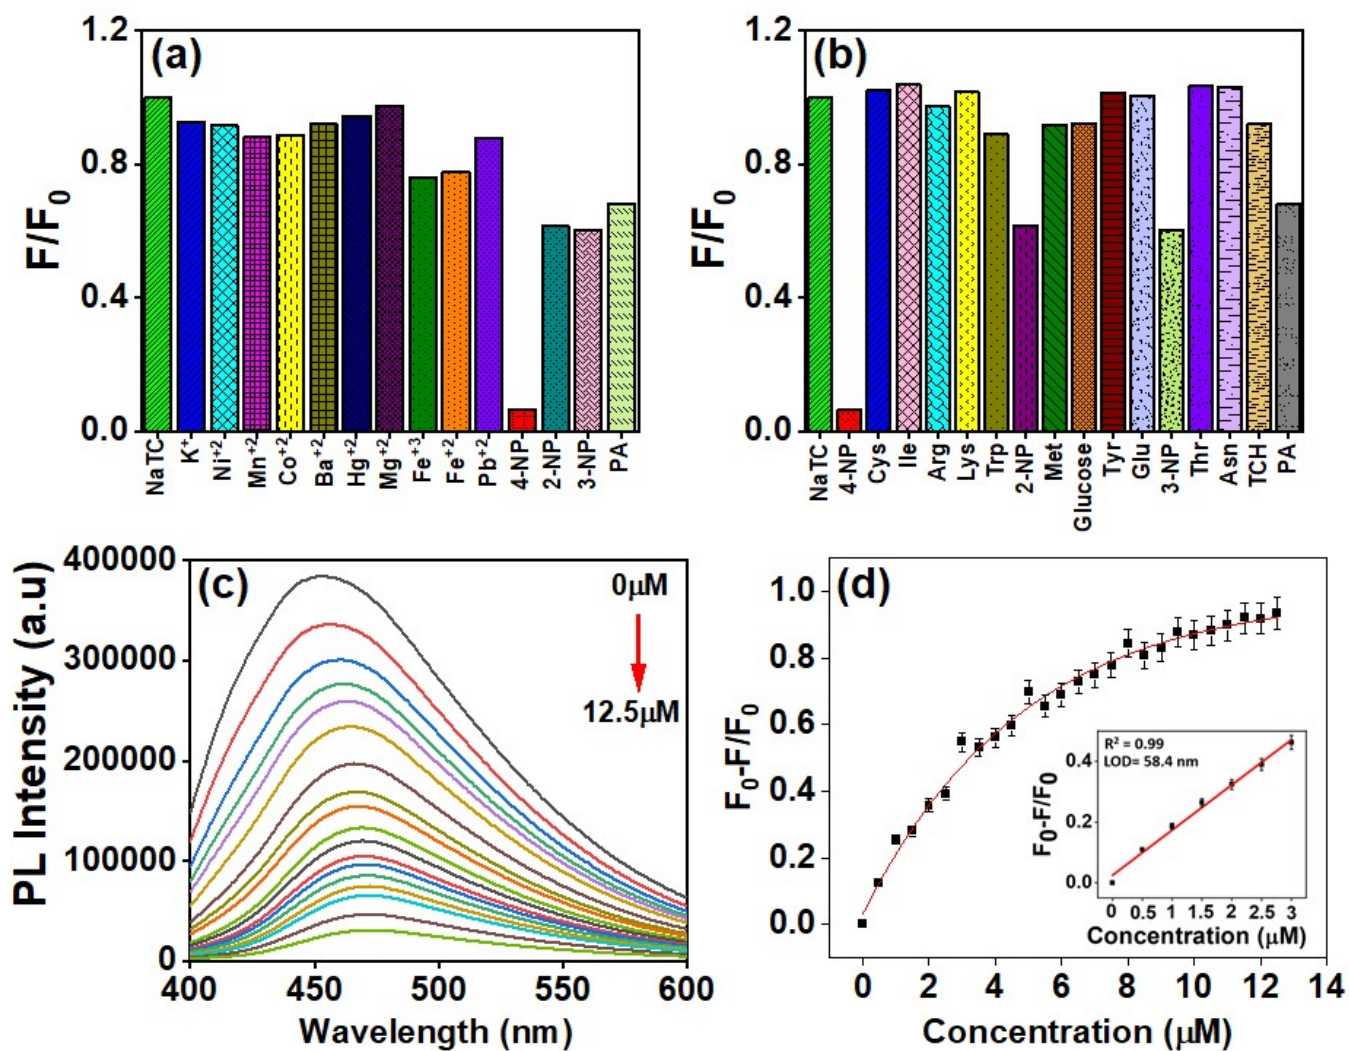

**Figure S7:** (a) Selectivity study of NaTC@CuNCs with various metal ion solutions; (b) Selectivity study of NaTC@CuNCs with various biomolecule solutions; (c) effect of varying concentrations of 4-NP on the PL intensity of NaTC@CuNCs and (d) relationship between  $F_0-F/F_0$  and varying concentration of 4-NP from 0-0.30  $\mu$ M (inset by varying the concentration of 4-NP from 0-1.0  $\mu$ M).



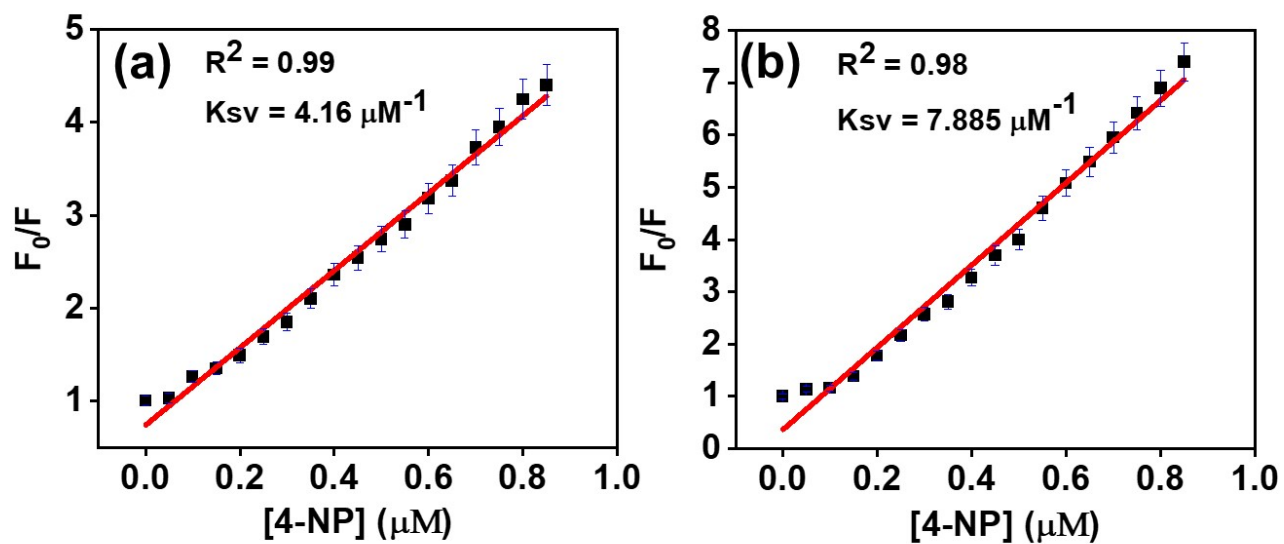

**Figure S8:** Stern-Volmer Plot of (a) NaC@CuNCs and (b) NaTC@CuNCs.

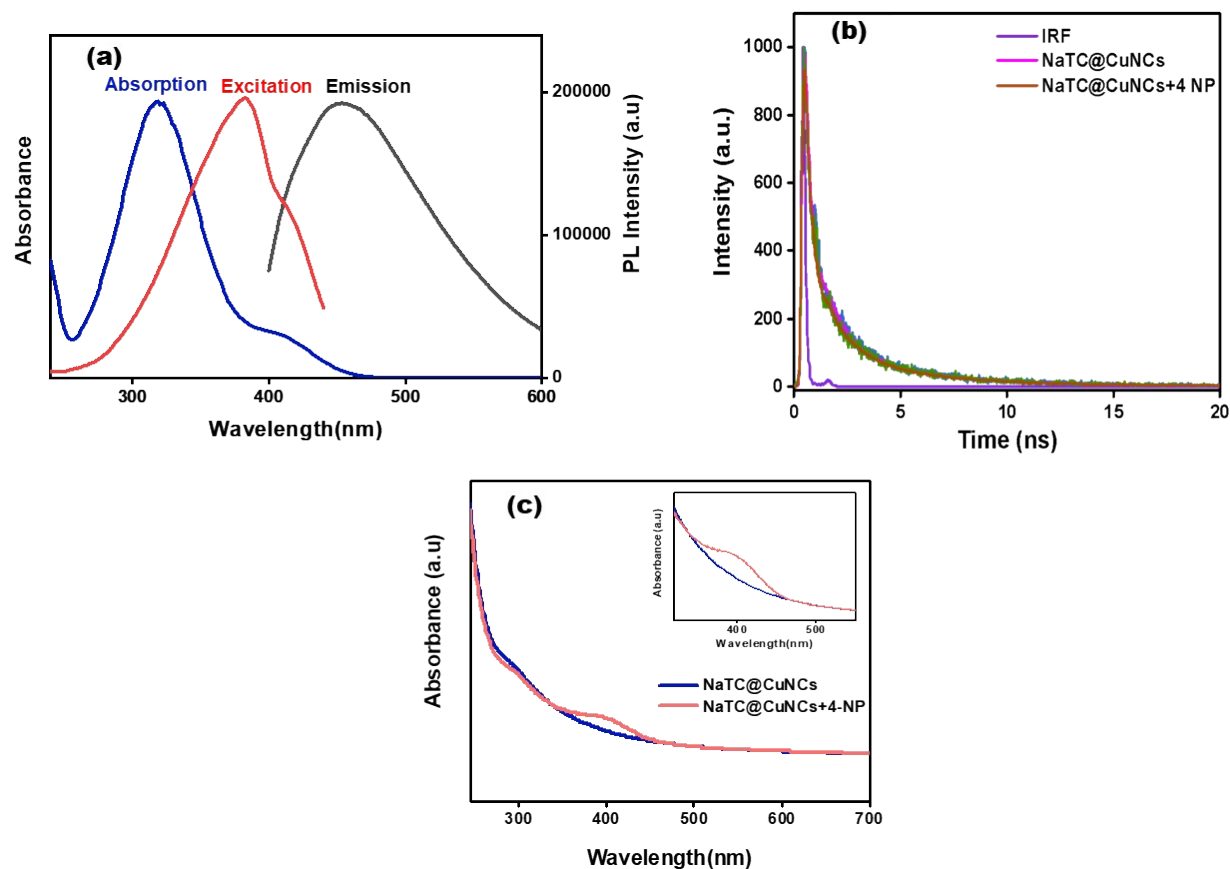

**Figure S9:** (a) Fluorescence excitation, emission peak of NaTC@CuNCs and the UV-Vis absorption peak of 4-NP; (b) Lifetime spectra of NaTC@CuNCs and (c) UV-Vis spectra of NaTC@CuNCs, NaTC@CuNCs + 4-NP (inset magnified image of same graph).

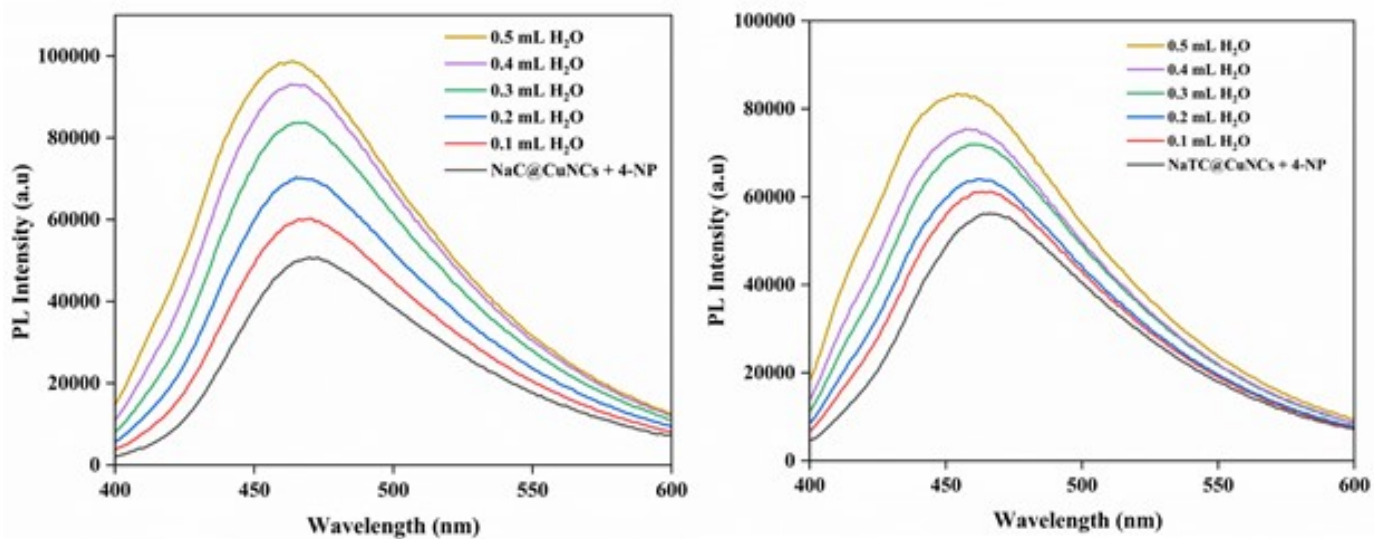

**Figure S10:** Dilution effect on [NaC@CuNCs + 4-NP] and [NaTc@CuNCs + 4-NP] .

**Table S1:** Time-resolved emission parameters.

| System          | Fluorescence lifetime in ns(amplitude) |                    |                    | Mean lifetime in ns |          |
|-----------------|----------------------------------------|--------------------|--------------------|---------------------|----------|
|                 | $\tau_1(\alpha_1)$                     | $\tau_2(\alpha_2)$ | $\tau_3(\alpha_3)$ | $\tau_m$            | $\chi^2$ |
| NaC@CuNCs       | 1.70<br>(0.25)                         | 6.03<br>(0.06)     | 0.21<br>(0.69)     | 0.93                | 1.05     |
| NaC@CuNCs+4-NP  | 1.64<br>(0.2)                          | 5.64<br>(0.07)     | 0.20<br>(0.73)     | 0.87                | 1.05     |
| NaTC@CuNCs      | 1.27<br>(0.23)                         | 4.82<br>(0.06)     | 0.17<br>(0.72)     | 0.70                | 1.09     |
| NaTC@CuNCs+4-NP | 1.34<br>(0.2)                          | 4.86<br>(0.06)     | 0.21<br>(0.74)     | 0.71                | 1.07     |

$$\tau_m = \tau_1(\alpha_1) + \tau_2(\alpha_2) + \tau_3(\alpha_3) / ((\alpha_1) + (\alpha_2) + (\alpha_3))$$
